# Supplementary material
Source: Springer Nature journal article supplement (https://www.springermedizin.de/resource/supplementary/12947_2013_463_MOESM5_ESM.pdf/9555798)
Supplement: MOESM5 [file 9555798]

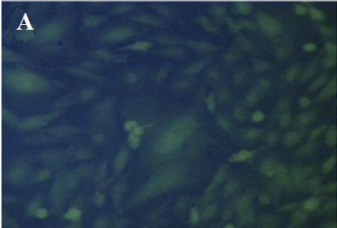

**NO/Ar-saturated solution  
In the absence of homoglobin**

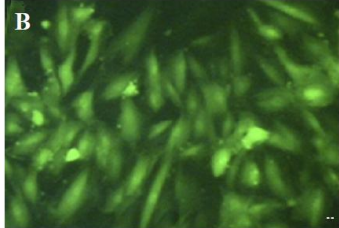

**NO/Ar-Containing liposome  
In the absence of homoglobin**

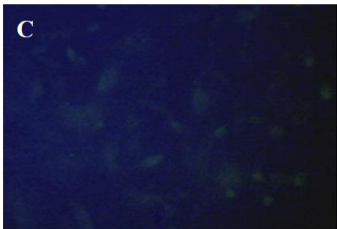

**NO/Ar-saturated solution  
In the presence of homoglobin**

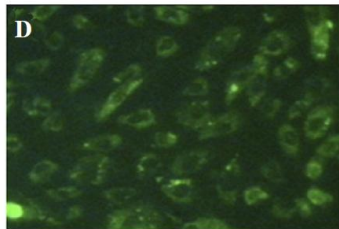

**NO/Ar-saturated solution  
In the presence of homoglobin**
